# Supplementary material for: Risk Factors for Positivity to Shiga Toxin-Producing Escherichia coli and Salmonella enterica in Backyard Production Systems Animals from Metropolitana Region, Chile: A Threat to Public Health?
Source: Int J Environ Res Public Health. 2021 Oct 13;18(20):10730. doi: 10.3390/ijerph182010730 (PMC8535594; doi:10.3390/ijerph182010730)
Supplement: Supplementary file 1 [file ijerph-18-10730-s001.zip › ijerph-1384377-supplementary.pdf]

BPS\_ID\_\_\_\_\_

I. General background

0. Date: \_\_\_\_/\_\_\_\_/\_\_\_\_

1. BPS\_ID: \_\_\_\_\_

2. Contact name: \_\_\_\_\_

3. Contact telephone number (to report diagnostic results): \_\_\_\_\_

4. Region: \_\_\_\_\_

5. Province: \_\_\_\_\_

6. BPS objective: a. Livestock: \_\_\_\_  
b. Agricultural: \_\_\_\_  
c. Forestry: \_\_\_\_  
d. Mixed: \_\_\_\_  
e. Other: \_\_\_\_

II. Social aspects

7. Primary activity of the holder: \_\_\_\_\_

8. Family group composition: \_\_\_\_\_

9. Importance of animals for household economy: \_\_\_\_\_ (Scale of 1 to 5)

III. Management conditions

10. Productive species: a. Poultry: \_\_\_\_ b. Swine: \_\_\_\_ c. Other domestic: \_\_\_\_ d. Pets: \_\_\_\_  
Which?: \_\_\_\_ Which?: \_\_\_\_ Which?: \_\_\_\_

11. Poultry objective

a. Household consumption: \_\_\_\_  
b. Sale: \_\_\_\_  
c. Household consumption and sale: \_\_\_\_  
d. Keeping poultry as pets: \_\_\_\_

Swine objective

a. Household consumption: \_\_\_\_  
b. Sale: \_\_\_\_  
c. Household consumption and sale: \_\_\_\_  
d. Keeping swine as pets: \_\_\_\_

12. Which species and how many birds are kept at the time of the survey?

|      | Species    | Total |
|------|------------|-------|
| 12.a | Chicken    |       |
| 12.b | Duck       |       |
| 12.c | Turkey     |       |
| 12.d | Goose      |       |
| 12.e | Guineafowl |       |
| 12.f |            |       |

How many pigs are maintained at the time of the survey?

|          | Male | Female | Total |
|----------|------|--------|-------|
| Adults   |      |        |       |
| Juvenile |      |        |       |
| Breeders |      |        |       |
| Piglets  |      |        |       |

13. N° Hens: \_\_\_\_  
N° Roosters: \_\_\_\_  
N° Chicks: \_\_\_\_

Loan breeding pig  
Yes: \_\_\_\_  
No: \_\_\_\_  
Doesn't apply: \_\_\_\_

14.

Breeder movement  
Enter: \_\_\_\_  
Leave: \_\_\_\_  
Doesn't apply: \_\_\_\_

15. Value per pig mount  
a. Piglet  
b. Money  
c. Doesn't apply
16. Last poultry breeding  
a. Actual  
b. 0 to 1 year ago  
c. 2 to 5 years ago  
d. More than 5 years ago
- Last swine breeding  
a. Actual  
b. 0 to 1 year ago  
c. 2 to 5 years ago  
d. More than 5 years ago
17. How long have you been rising: Poultry? Swine?  
a. Less than 2 years:\_\_\_\_ a. Less than 2 years:\_\_\_\_  
b. Between 2 to 10 years:\_\_\_\_ b. Between 2 to 10 years:\_\_\_\_  
c. Between 11 to 20 years:\_\_\_\_ c. Between 11 to 20 years:\_\_\_\_  
d. More than 20 years:\_\_\_\_ d. More than 20 years:\_\_\_\_
18. Responsible for handling poultry Responsible for handling swine  
a. Man:\_\_\_\_ a. Man:\_\_\_\_  
b. Woman:\_\_\_\_ b. Woman:\_\_\_\_  
c. Son/daughter:\_\_\_\_ c. Son/daughter:\_\_\_\_  
d. Family:\_\_\_\_ d. Family:\_\_\_\_
19. Responsible for trading of poultry Responsible for trading of swine  
a. Man:\_\_\_\_ a. Man:\_\_\_\_  
b. Woman:\_\_\_\_ b. Woman:\_\_\_\_  
c. Son/daughter:\_\_\_\_ c. Son/daughter:\_\_\_\_  
d. Family:\_\_\_\_ d. Family:\_\_\_\_  
e. Doesn't apply:\_\_\_\_ e. Doesn't apply:\_\_\_\_
20. What is the type of confinement for poultry? What is the type of confinement for swine?  
a. Free a. Free  
b. Permanent b. Permanent  
c. Mix c. Mix
21. Does the number of birds vary throughout the year? When are there more?  
a. Spring/summer:\_\_\_\_  
b. Autumn/Winter:\_\_\_\_  
c. Doesn't vary:\_\_\_\_
- Does the number of pigs vary throughout the year? When are there more?  
a. Spring/summer:\_\_\_\_  
b. Autumn/Winter:\_\_\_\_  
c. Doesn't vary:\_\_\_\_
22. How do you obtain bird replacements? Exchange of embryonated eggs?  
a. Own replacements:\_\_\_\_ Yes:\_\_\_\_  
b. Buying to neighbours:\_\_\_\_ No:\_\_\_\_  
c. Purchasing at trade fairs:\_\_\_\_  
d. Commercial farm purchasing:\_\_\_\_  
e. Obtained through state projects:\_\_\_\_  
f. Buying from intermediaries:\_\_\_\_
- How do you obtain pig replacements?  
a. Own replacements:\_\_\_\_  
b. Buying to neighbours:\_\_\_\_  
c. Purchasing at trade fairs:\_\_\_\_  
d. Commercial farm purchasing:\_\_\_\_  
e. Obtained through state projects:\_\_\_\_  
f. Buying from intermediaries:\_\_\_\_

23. OBSERVE Presence of Broiler/Layers (trimmed beak)

- a. Yes: \_\_\_\_\_
- b. No: \_\_\_\_\_

OBSERVE Presence of pig with the tail docked

- a. Yes: \_\_\_\_\_
- b. No: \_\_\_\_\_

24. What does poultry food consist of?

- a. Organic household waste: \_\_\_\_\_
- b. Poultry food: \_\_\_\_\_
- c. Poultry foraging: \_\_\_\_\_
- d. Cereals (e.g. corn): \_\_\_\_\_

What does swine food consist of?

- a. Organic household waste: \_\_\_\_\_
- b. Swine food: \_\_\_\_\_
- c. Swine foraging: \_\_\_\_\_
- d. Cereals (e.g. flour): \_\_\_\_\_

25. Where does water for poultry come from?

- a. Well: \_\_\_\_\_
- b. Creek: \_\_\_\_\_
- c. Potable: \_\_\_\_\_
- d. Doesn't provide: \_\_\_\_\_

Where does water for swine come from?

- a. Well: \_\_\_\_\_
- b. Creek: \_\_\_\_\_
- c. Potable: \_\_\_\_\_
- d. Doesn't provide: \_\_\_\_\_

26. What do you do with dead chickens?

- a. Bury: \_\_\_\_\_
- b. Burn: \_\_\_\_\_
- c. Trash: \_\_\_\_\_
- d. Throw away from home: \_\_\_\_\_
- e. Household consumption/Sale: \_\_\_\_\_
- f. Nothing: \_\_\_\_\_

What do you do with dead pigs?

- a. Bury: \_\_\_\_\_
- b. Burn: \_\_\_\_\_
- c. Trash: \_\_\_\_\_
- d. Throw away from home: \_\_\_\_\_
- e. Household consumption/Sale: \_\_\_\_\_
- f. Nothing: \_\_\_\_\_

27. Do you recognize any disease in chickens? Signs?

---

---

---

Do you recognize any disease in pigs? Signs?

---

---

---

28. What do you do if you recognize a sick chicken?

---

---

---

What do you do if you recognize a sick pig?

---

---

---

29. Do you perform any type of sanitary management or treatment of the chickens?

- a. Drugs: \_\_\_\_\_
- b. Natural products: \_\_\_\_\_
- c. Doesn't perform: \_\_\_\_\_

Do you perform any type of sanitary management or treatment of the pigs?

- a. Drugs: \_\_\_\_\_
- b. Natural products: \_\_\_\_\_
- c. Doesn't perform: \_\_\_\_\_

30. Drugs administered to chickens:

---

---

---

Drugs administered to pigs:

---

---

---

31. Do you vaccinate the chickens?

- a. Yes: \_\_\_\_\_
- b. No: \_\_\_\_\_

Do you vaccinate the pigs?

- a. Yes: \_\_\_\_\_
- b. No: \_\_\_\_\_

32. Poultry receive a visit from a veterinarian?

- a. Once a year: \_\_\_\_\_
- b. More than once a year: \_\_\_\_\_
- c. Doesn't receive: \_\_\_\_\_

Swine receives a visit from a veterinarian?

- a. Once a year: \_\_\_\_\_
- b. More than once a year: \_\_\_\_\_
- c. Doesn't receive: \_\_\_\_\_

#### IV. Biosecurity

33. Is there contact between poultry and pigs?

a. Yes: \_\_\_\_\_

b. No: \_\_\_\_\_

c. Doesn't apply: \_\_\_\_\_

General biosecurity conditions:

34. Functional fences

a. Yes: \_\_\_\_\_

b. No: \_\_\_\_\_

35. Presence of footbath

a. Yes: \_\_\_\_\_

b. No: \_\_\_\_\_

36. Disinfection prior to animal handling

a. Yes: \_\_\_\_\_

b. No: \_\_\_\_\_

37. Disinfection after animal handling

a. Yes: \_\_\_\_\_

b. No: \_\_\_\_\_

Environmental factors:

38. Watercourse inside the BPS

a. Yes: \_\_\_\_\_

b. No: \_\_\_\_\_

39. Neighboring wetlands or watercourses

a. Yes: \_\_\_\_\_

b. No: \_\_\_\_\_

40. Poultry or pigs in adjacent facilities

a. Yes: \_\_\_\_\_

b. No: \_\_\_\_\_

41. Neighboring commercial farms

a. Yes: \_\_\_\_\_

b. No: \_\_\_\_\_

42. Poultry have access to watercourse

a. Yes: \_\_\_\_\_

b. No: \_\_\_\_\_

43. Poultry have or may have contact with wild birds?

a. Yes: \_\_\_\_\_

b. No: \_\_\_\_\_

Swine have or may have contact with wild birds?

a. Yes: \_\_\_\_\_

b. No: \_\_\_\_\_

44. Poultry have or may have contact with:

Neighboring animals: a. Yes: \_\_\_\_\_ b. No: \_\_\_\_\_

Swine have or may have contact with:

Neighboring animals: a. Yes: \_\_\_\_\_ b. No: \_\_\_\_\_

45. When a new bird enters the farm:

a. Is separated from the group for a while: \_\_\_\_\_

b. Immediately joins the group: \_\_\_\_\_

c. Doesn't apply: \_\_\_\_\_

When a new pig enters the farm:

a. Is separated from the group for a while: \_\_\_\_\_

b. Immediately joins the group: \_\_\_\_\_

c. Doesn't apply: \_\_\_\_\_

46. Can visitors have contact with the birds?

a. Yes: \_\_\_\_\_

b. No: \_\_\_\_\_

Can visitors have contact with the pigs?

a. Yes: \_\_\_\_\_

b. No: \_\_\_\_\_

47. Do you give eggs or chickens?

a. Yes: \_\_\_\_\_

b. No: \_\_\_\_\_

Did you give away pigs?

a. Yes: \_\_\_\_\_

b. No: \_\_\_\_\_

48. To whom?: \_\_\_\_\_

To whom?: \_\_\_\_\_

#### V. Commercial aspects

49. What products do you obtain from poultry and which is the most important?

a. Meat: \_\_\_\_\_

b. Eggs: \_\_\_\_\_

c. Live chickens/hens: \_\_\_\_\_

d. Guano: \_\_\_\_\_

Which product obtained from the pigs is the most important?

a. Kg/animal: \_\_\_\_\_

b. Piglets: \_\_\_\_\_

c. Others: \_\_\_\_\_

50. How many eggs do you collect per day?

\_\_\_\_\_

51. What is the price?

Eggs: \_\_\_\_\_

Live chickens/hens: \_\_\_\_\_

Meat: \_\_\_\_\_

Guano: \_\_\_\_\_

What is the price?

Meat: \_\_\_\_\_

Piglets: \_\_\_\_\_

Others: \_\_\_\_\_

Other:\_\_\_\_\_

52. What is the income from poultry used for?

- a. Poultry feed:\_\_\_\_\_
- b. Household expenses:\_\_\_\_\_
- c. Clothes:\_\_\_\_\_
- d. Children's school:\_\_\_\_\_
- e. Other:\_\_\_\_\_

What is the income from swine used for?

- a. Swine feed:\_\_\_\_\_
- b. Household expenses:\_\_\_\_\_
- c. Clothes:\_\_\_\_\_
- d. Children's school:\_\_\_\_\_
- e. Other:\_\_\_\_\_

53. If you sell, what is your main market?

- a. Neighbors/ Family:\_\_\_\_\_
- b. Tourists:\_\_\_\_\_
- c. Local markets:\_\_\_\_\_
- d. Intermediate:\_\_\_\_\_
- e. More than one market:\_\_\_\_\_
- f. Restaurant:\_\_\_\_\_

If you sell, what is your main market?

- a. Neighbors/Family:\_\_\_\_\_
- b. Tourists:\_\_\_\_\_
- c. Local markets:\_\_\_\_\_
- d. Intermediate:\_\_\_\_\_
- e. More than one market:\_\_\_\_\_
- f. Restaurant:\_\_\_\_\_

54. How many eggs do you sell per month?

\_\_\_\_\_

How many pigs do you sell per year/season?

\_\_\_\_\_

55. How many live chickens/hens do you sell per month?

\_\_\_\_\_

How many kilograms?

\_\_\_\_\_

56. How many eggs do you eat per week?

\_\_\_\_\_

How many pigs do you slaughter per year?

\_\_\_\_\_

57. How many chickens do you slaughter per week?

\_\_\_\_\_

58. How many eggs do you buy per month (from market)?

\_\_\_\_\_

59. How much poultry meat do you buy per month?

\_\_\_\_\_

60. How much do you spend on poultry feeding per month?

\_\_\_\_\_

How much do you spend on feeding swine per month?

\_\_\_\_\_

61. Animals are inspected or visited by SAG:

- a. Yes:\_\_\_\_\_
- b. No:\_\_\_\_\_

62. If you receive SAG visits, do they take samples?

- a. Yes:\_\_\_\_\_
- b. No:\_\_\_\_\_

63. SAG sends the results?

- a. Yes:\_\_\_\_\_
- b. No:\_\_\_\_\_

64. SAG returns to the BPS?

- a. Yes:\_\_\_\_\_
- b. No:\_\_\_\_\_

65. Animals receive visits or inspection by INDAP/PRODESAL?

- a. Yes:\_\_\_\_\_
- b. No:\_\_\_\_\_

Any of the members of the family group have presented some of the following signs and/or symptoms during the last month:

66. Diarrhea  
a. Yes:\_\_\_\_ b. No:\_\_\_\_
67. Fever  
a. Yes:\_\_\_\_ b. No:\_\_\_\_
68. Vomits  
a. Yes:\_\_\_\_ b. No:\_\_\_\_
69. Inappetence  
a. Yes:\_\_\_\_ b. No:\_\_\_\_
70. Muscle pain  
a. Yes:\_\_\_\_ b. No:\_\_\_\_
71. Do people with digestive disorders have the possibility to handle animals?  
a. Yes:\_\_\_\_ b. No:\_\_\_\_
72. Are pets indoor?  
a. Yes:\_\_\_\_ b. No:\_\_\_\_
73. Do pets have access to bird waste?  
a. Yes:\_\_\_\_ b. No:\_\_\_\_
74. Is there contact between animals kept in the BPS (between different species)?  
a. Yes:\_\_\_\_ b. No:\_\_\_\_
75. Is there contact between BPS's poultry and neighboring pets/animals?  
a. Yes:\_\_\_\_ b. No:\_\_\_\_

#### VI. Sample data

Type of sample birds: a. Cloacal torula:\_\_\_\_

Type of sample pigs: a. Rectal torula:\_\_\_\_

Type of sample from other animals: a. Rectal torula:\_\_\_\_

#### Animal data

- 1
- 2
- 3
- 4
- 5
- 6
- 7
- 8
- 9
- 10
- 11
- 12
